# Supplementary material for: Basigin drives intracellular accumulation of l-lactate by harvesting protons and substrate anions
Source: PubMed Central journal article supplement (PMC7996999; doi:10.1371/journal.pone.0249110), 2021-03-26
Supplement: pone.0249110.s003.pdf [file pone.0249110.s003.pdf]

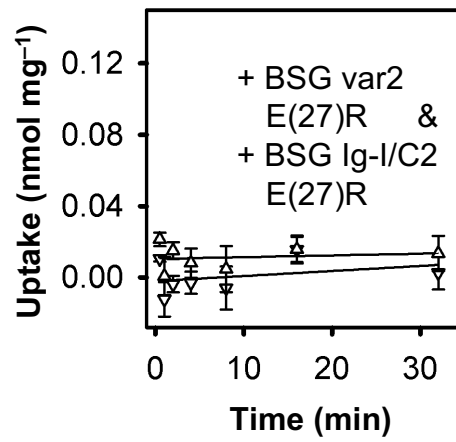

**Figure S3.** Uptake of <sup>14</sup>C-labeled L-lactate into *jen1Δ ady2Δ* yeast over time at pH 6.8 and a 1 mM inward gradient. Shown are curves for BSG Ig-I/C2 E(27)R (▽) and BSG var2 E(27)R (△). The data were normalized to 1 mg of cells and the background of non-expressing cells was subtracted. Error bars indicate ± S.E.M. from three biological replicates.
