# Supplementary material for: Basigin drives intracellular accumulation of l-lactate by harvesting protons and substrate anions
Source: PubMed Central journal article supplement (PMC7996999; doi:10.1371/journal.pone.0249110), 2021-03-26
Supplement: pone.0249110.s004.pdf [file pone.0249110.s004.pdf]

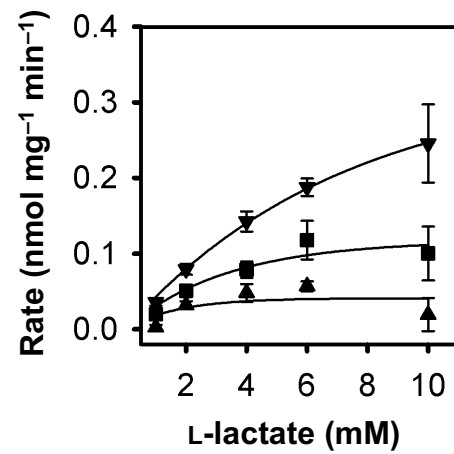

**Figure S4.** Michaelis-Menten kinetics for MCT1 fused with BSG variants. Shown are curves for BSGΔIg (■), BSG Ig-I/C2 (▼), BSG var2 (▲). The data were normalized to 1 mg of cells and the background of non-expressing cells was subtracted. Error bars indicate  $\pm$  S.E.M. from three biological replicates.
